# Supplementary material for: Clinical Outcome of Intra-Articular Injection of Platelet Rich Plasma in Osteoarthritis Knee
Source: Research Square preprint supplement (doi:10.21203/rs.3.rs-6864842/v1), 2025-07-27
Supplement: Supplementary file 1 [file 4fa12a0deacd9a1fa3cd3bb9.docx]

## **Study Dataset**

| AGE CATEGORY | | 50 - 59 | 50 - 59 | 50 - 59 | 50 - 59 | 60 - 69 | 50 - 59 | 50 - 59 | 50 - 59 | 50 - 59 | 50 - 59 | 60 - 69 | 50 - 59 | 50 - 59 | 70 - 79 | 50 - 59 | 60 - 69 | 60 - 69 |
| --- | --- | --- | --- | --- | --- | --- | --- | --- | --- | --- | --- | --- | --- | --- | --- | --- | --- | --- |
| SIDE EFFECTS | |  |  |  |  | PAIN |  |  |  |  | PAIN |  |  |  |  |  |  |  |
| WOMAC SCORE | 6Mnth | 52 | 70 | 50 | 50 | 30 | 28 | 30 | 31 | 58 | 28 | 40 | 38 | 28 | 41 | 36 | 39 | 28 |
| 4Mnth | 65 | 72 | 62 | 62 | 48 | 31 | 44 | 42 | 60 | 47 | 54 | 44 | 46 | 43 | 40 | 42 | 38 |
| 2Mnth | 71 | 80 | 72 | 72 | 67 | 61 | 60 | 62 | 66 | 67 | 66 | 58 | 53 | 52 | 57 | 52 | 56 |
| Pre-Inj | 81 | 86 | 76 | 76 | 72 | 73 | 71 | 73 | 67 | 73 | 76 | 69 | 63 | 69 | 71 | 63 | 64 |
| VAS SCORE | 6Mnth | 5 | 7 | 5 | 5 | 3 | 3 | 3 | 3 | 4 | 3 | 4 | 3 | 3 | 3 | 3 | 4 | 3 |
| 4Mnth | 6 | 7 | 6 | 6 | 5 | 3 | 4 | 4 | 6 | 4 | 5 | 4 | 4 | 4 | 4 | 4 | 4 |
| 2Mnth | 7 | 8 | 7 | 7 | 6 | 6 | 6 | 6 | 6 | 6 | 7 | 5 | 5 | 5 | 5 | 5 | 5 |
| Pre-Inj | 8 | 8 | 6 | 6 | 6 | 6 | 6 | 8 | 6 | 8 | 8 | 6 | 6 | 6 | 6 | 6 | 6 |
| KLGRADE | | 2 | 3 | 2 | 2 | 2 | 2 | 3 | 2 | 2 | 3 | 2 | 2 | 2 | 3 | 2 | 3 | 2 |
| COMORBIDITIES | | HTN |  |  |  | HTN, DM | HTN |  |  |  | HTN |  |  |  | HTN, DM, THY |  | DM, THY |  |
| SIDE | | R | R | R | L | R | L | R | R | L | L | L | R | L | R | L | R | L |
| DURATION MONTHS | | 9 | 24 | 72 | 9 | 12 | 6 | 12 | 24 | 12 | 2 | 6 | 48 | 8 | 24 | 9 | 3 | 18 |
| RISE IN LOCAL TEMPERATURE | | A | A | A | A | A | A | A | A | A | A | A | A | A | A | A | A | A |
| CREPITUS | | P | A | P | P | P | A | P | P | A | P | A | P | A | P | P | A | P |
| BONY ENLARGEMENT | | A | A | P | P | A | A | A | A | P | P | A | A | A | P | A | A | A |
| BONY TENDERNESS | | A | P | A | A | P | A | P | A | A | P | P | P | A | P | A | P | A |
| STIFFNESS | | P | A | P | P | P | P | P | P | P | P | A | P | P | P | A | P | P |
| KNEE PAIN | | P | P | P | P | P | P | P | P | P | P | P | P | P | P | P | P | P |
| SEX | | F | F | F | F | M | F | F | F | F | F | F | F | F | M | F | F | F |
| AGE | | 55 | 50 | 51 | 51 | 63 | 55 | 50 | 54 | 55 | 52 | 62 | 59 | 57 | 70 | 51 | 65 | 68 |
| PATIENT NUMBER | | 79010241 | 80035952 | 79055910 | 79055910 | 80035965 | 78045598 | 80036075 | 79051415 | 80032084 | 80002854 | 79010576 | 80013332 | 80002289 | 80028946 | 79022302 | 80036780 | 80013134 |
| S.NO | | 1 | 2 | 3 | 4 | 5 | 6 | 7 | 8 | 9 | 10 | 11 | 12 | 13 | 14 | 15 | 16 | 17 |

| 50 - 59 | 50 - 59 | 60 - 69 | 60 - 69 | 60 - 69 | 50 - 59 | 50 - 59 | 60 - 69 | 50 - 59 | 60 - 69 | 50 - 59 | 60 - 69 | 60 - 69 | 50 - 59 | 50 - 59 | 50 - 59 | 70 – 79 | 70 - 79 | 50 - 59 | 50 - 59 | 50 - 59 | 50 - 59 | 60 - 69 |
| --- | --- | --- | --- | --- | --- | --- | --- | --- | --- | --- | --- | --- | --- | --- | --- | --- | --- | --- | --- | --- | --- | --- |
|  |  |  |  |  | PAIN | PAIN |  |  |  |  |  |  |  |  |  |  |  |  |  |  |  | PAIN |
| 36 | 32 | 49 | 34 | 34 | 40 | 32 | 38 | 28 | 32 | 30 | 39 | 27 | 30 | 42 | 47 | 38 | 26 | 38 | 36 | 32 | 35 | 30 |
| 41 | 40 | 52 | 54 | 54 | 52 | 54 | 54 | 40 | 39 | 42 | 51 | 22 | 40 | 43 | 50 | 49 | 48 | 54 | 54 | 47 | 52 | 59 |
| 51 | 49 | 66 | 61 | 61 | 67 | 66 | 64 | 57 | 56 | 62 | 63 | 25 | 57 | 68 | 62 | 61 | 64 | 66 | 70 | 66 | 68 | 69 |
| 64 | 64 | 76 | 73 | 73 | 73 | 72 | 74 | 74 | 68 | 74 | 73 | 64 | 68 | 73 | 70 | 74 | 74 | 71 | 72 | 78 | 79 | 72 |
| 4 | 3 | 5 | 3 | 3 | 4 | 3 | 4 | 2 | 4 | 3 | 5 | 2 | 3 | 4 | 4 | 4 | 4 | 4 | 4 | 3 | 4 | 3 |
| 4 | 4 | 5 | 5 | 5 | 4 | 5 | 5 | 4 | 4 | 4 | 5 | 2 | 4 | 4 | 5 | 5 | 4 | 5 | 5 | 5 | 5 | 6 |
| 5 | 5 | 6 | 6 | 6 | 6 | 6 | 6 | 5 | 6 | 5 | 6 | 2 | 5 | 7 | 6 | 6 | 6 | 6 | 7 | 6 | 6 | 6 |
| 6 | 6 | 6 | 8 | 8 | 6 | 8 | 6 | 8 | 8 | 8 | 6 | 6 | 6 | 8 | 8 | 8 | 8 | 8 | 8 | 8 | 6 | 8 |
| 2 | 2 | 2 | 3 | 2 | 3 | 2 | 2 | 2 | 3 | 2 | 3 | 3 | 2 | 3 | 2 | 2 | 2 | 2 | 2 | 2 | 3 | 2 |
|  |  | HTN, THY |  |  |  |  |  | HTN, DM |  |  |  | HTN |  |  |  | HTN, DM, THY | HTN, DM | DEP |  |  |  |  |
| L | L | L | L | R | R | R | L | R | L | R | L | L | L | L | L | R | L | L | R | L | R | L |
| 6 | 12 | 12 | 24 | 6 | 84 | 12 | 36 | 7 | 36 | 24 | 60 | 18 | 7 | 7 | 24 | 36 | 96 | 24 | 36 | 24 | 12 | 120 |
| A | A | A | A | A | A | A | A | A | A | A | A | A | A | A | A | A | A | A | A | A | A | A |
| P | A | P | P | P | A | P | P | A | P | P | A | P | P | A | P | P | A | P | P | A | P | P |
| P | P | A | P | P | A | A | P | A | A | A | A | A | A | A | A | A | P | A | A | A | A | P |
| P | A | P | A | A | P | A | P | A | P | A | P | A | P | A | P | A | P | A | P | A | P | A |
| P | P | P | P | P | P | P | P | P | P | A | P | P | A | P | P | P | P | A | P | P | P | P |
| P | P | P | P | P | P | P | P | P | P | P | P | P | P | P | P | P | P | P | P | P | P | P |
| M | F | F | M | M | M | F | M | F | F | F | F | F | F | M | F | F | F | F | F | M | M | F |
| 56 | 52 | 65 | 62 | 62 | 56 | 50 | 61 | 50 | 68 | 55 | 68 | 61 | 50 | 50 | 50 | 71 | 72 | 58 | 50 | 55 | 56 | 63 |
| 77018290 | 80031775 | 80037291 | 79023475 | 79023475 | 80037517 | 80037784 | 78043636 | 80009135 | 77008753 | 80038420 | 79057776 | 80007667 | 80036953 | 80039356 | 80028048 | 80073857 | 80039508 | 80039648 | 80040158 | 80018890 | 80040575 | 80022676 |
| 18 | 19 | 20 | 21 | 22 | 23 | 24 | 25 | 26 | 27 | 28 | 29 | 30 | 31 | 32 | 33 | 34 | 35 | 36 | 37 | 38 | 39 | 40 |

| 80+ | 50 - 59 | 70 - 79 | 50 - 59 | 60 - 69 | 50 - 59 | 70 - 79 | 60 - 69 | 50 - 59 | 50 - 59 | 70 - 79 | 50 - 59 | 50 - 59 | 60 - 69 | 80+ | 60 - 69 | 60 - 69 | 50 - 59 | 60 - 69 | 50 - 59 | 60 - 69 |
| --- | --- | --- | --- | --- | --- | --- | --- | --- | --- | --- | --- | --- | --- | --- | --- | --- | --- | --- | --- | --- |
|  |  |  |  |  |  | PAIN |  |  |  | PAIN |  | PAIN | PAIN |  |  |  |  |  |  |  |
| 29 | 30 | 43 | 40 | 32 | 40 | 40 | 32 | 26 | 29 | 54 | 36 | 32 | 62 | 70 | 60 | 63 | 53 | 45 | 58 | 53 |
| 42 | 48 | 56 | 57 | 51 | 56 | 48 | 58 | 43 | 48 | 64 | 58 | 48 | 64 | 69 | 58 | 68 | 56 | 63 | 69 | 54 |
| 64 | 60 | 58 | 65 | 66 | 68 | 64 | 70 | 52 | 65 | 66 | 72 | 64 | 70 | 68 | 59 | 73 | 64 | 68 | 69 | 57 |
| 78 | 75 | 73 | 76 | 73 | 81 | 74 | 82 | 73 | 79 | 80 | 81 | 76 | 78 | 72 | 67 | 72 | 69 | 74 | 73 | 64 |
| 3 | 3 | 4 | 4 | 3 | 4 | 4 | 3 | 3 | 3 | 4 | 3 | 3 | 5 | 7 | 6 | 6 | 5 | 4 | 5 | 5 |
| 5 | 5 | 4 | 5 | 5 | 5 | 5 | 5 | 4 | 5 | 5 | 5 | 4 | 6 | 7 | 6 | 6 | 5 | 6 | 7 | 5 |
| 7 | 6 | 6 | 6 | 6 | 6 | 6 | 7 | 5 | 6 | 6 | 6 | 6 | 6 | 7 | 6 | 8 | 6 | 7 | 7 | 5 |
| 8 | 8 | 7 | 8 | 8 | 8 | 8 | 8 | 8 | 8 | 8 | 8 | 8 | 7 | 8 | 7 | 8 | 6 | 8 | 8 | 7 |
| 3 | 2 | 3 | 2 | 2 | 2 | 3 | 3 | 2 | 2 | 3 | 3 | 2 | 2 | 3 | 2 | 2 | 2 | 2 | 2 | 3 |
| HTN, DM, THY |  | ANX |  |  |  | HTN |  |  |  | DM, HTN |  |  | THY | DM, HTN, THY |  |  |  | DM, THY |  |  |
| R | R | L | L | R | L | R | R | R | L | L | R | L | R | R | R | R | R | R | R | R |
| 60 | 69 | 48 | 12 | 60 | 2 | 60 | 36 | 6 | 2 | 96 | 1 | 120 | 24 | 10 | 15 | 1 | 1 | 9 | 12 | 2 |
| A | A | A | A | A | A | A | A | A | A | A | A | A | A | A | A | A | A | A | A | A |
| A | P | P | A | P | P | A | P | P | A | P | P | A | P | P | A | P | P | A | P | P |
| P | A | A | A | A | A | A | A | P | A | A | A | A | P | A | A | A | A | A | P | A |
| P | A | P | A | P | A | P | A | P | A | P | A | P | A | P | A | P | A | P | A | P |
| P | P | P | P | A | A | P | P | P | P | P | P | P | P | P | P | P | A | P | A | P |
| P | P | P | P | P | P | P | P | P | P | P | P | P | P | P | P | P | P | P | P | P |
| M | M | F | F | M | F | M | M | F | F | F | F | F | F | M | M | F | F | M | F | M |
| 80 | 50 | 75 | 55 | 62 | 55 | 73 | 64 | 56 | 50 | 75 | 51 | 54 | 68 | 82 | 65 | 65 | 59 | 66 | 53 | 65 |
| 80038495 | 80040933 | 80040961 | 80040940 | 79035940 | 80041158 | 80040878 | 80040077 | 80041545 | 79018064 | 80041744 | 78013391 | 80042577 | 80042766 | 80042843 | 70040040 | 79026990 | 80043067 | 79045004 | 76050320 | 80036977 |
| 41 | 42 | 43 | 44 | 45 | 46 | 47 | 48 | 49 | 50 | 51 | 52 | 53 | 54 | 55 | 56 | 57 | 58 | 59 | 60 | 61 |
